# Supplementary material for: Targeting the mRNA-binding protein HuR impairs malignant characteristics of pancreatic ductal adenocarcinoma cells
Source: PubMed Central journal article supplement (PMC4694992; doi:10.18632/oncotarget.4743), 2015-07-25
Supplement: oncotarget-06-27312-s001.pdf [file oncotarget-06-27312-s001.pdf]

## SUPPLEMENTARY FIGURES AND TABLES

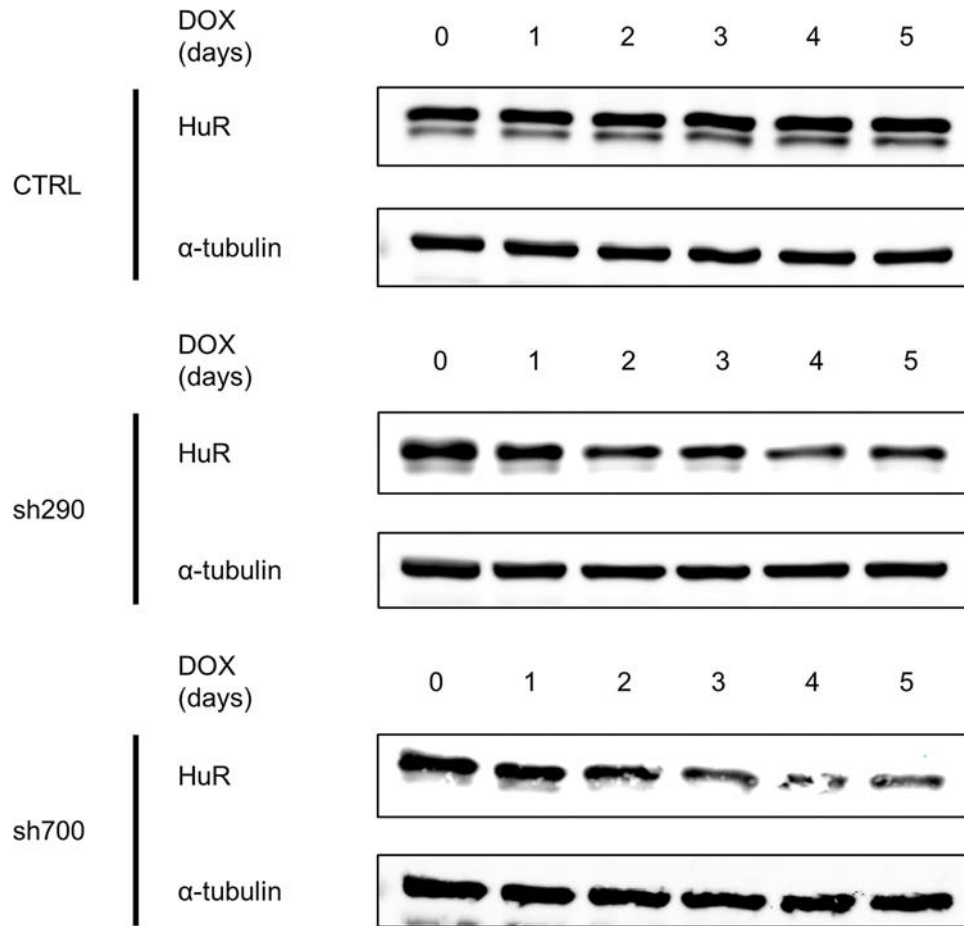

**Supplementary Figure S1: Time course of DOX-induced HuR silencing.** Western blot of HuR protein expression in Mia.CTRL, Mia.sh290, and Mia.sh700 cells treated with 2  $\mu$ g/ml DOX for the indicated time points. Alpha-tubulin was used as normalization control.

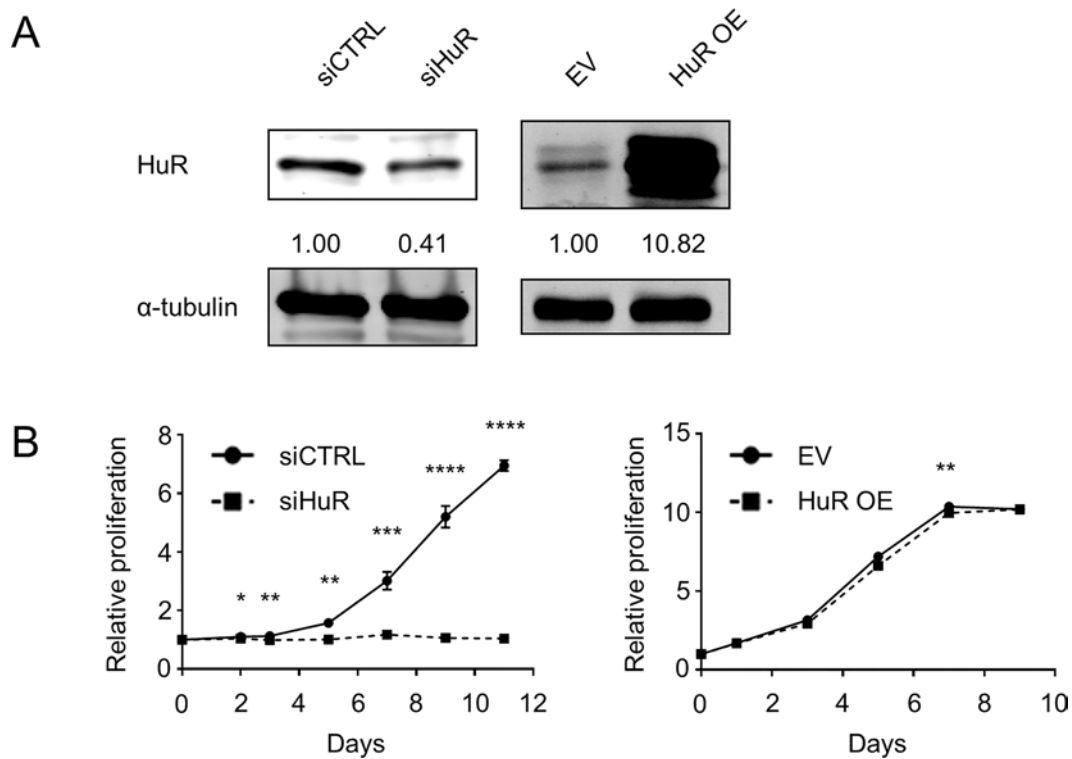

**Supplementary Figure S2: Short-term proliferation of transiently transfected PL5 cells.** **A.** Representative western blot of HuR protein expression in PL5 cells transiently transfected with control siRNA (siCTRL), HuR siRNA (siHuR), empty vector (EV), or HuR overexpression plasmid (HuR OE) for 3 days. Alpha-tubulin was used as normalization control. **B.** Relative proliferation of transiently transfected PL5 cells, as determined by measurement of dsDNA content by PicoGreen staining. Each data point represents the mean of 5 independent experiments  $\pm$  SEM. \* =  $p < 0.05$ ; \*\* =  $p < 0.01$ ; \*\*\* =  $p < 0.001$ ; \*\*\*\* =  $p < 0.0001$ .

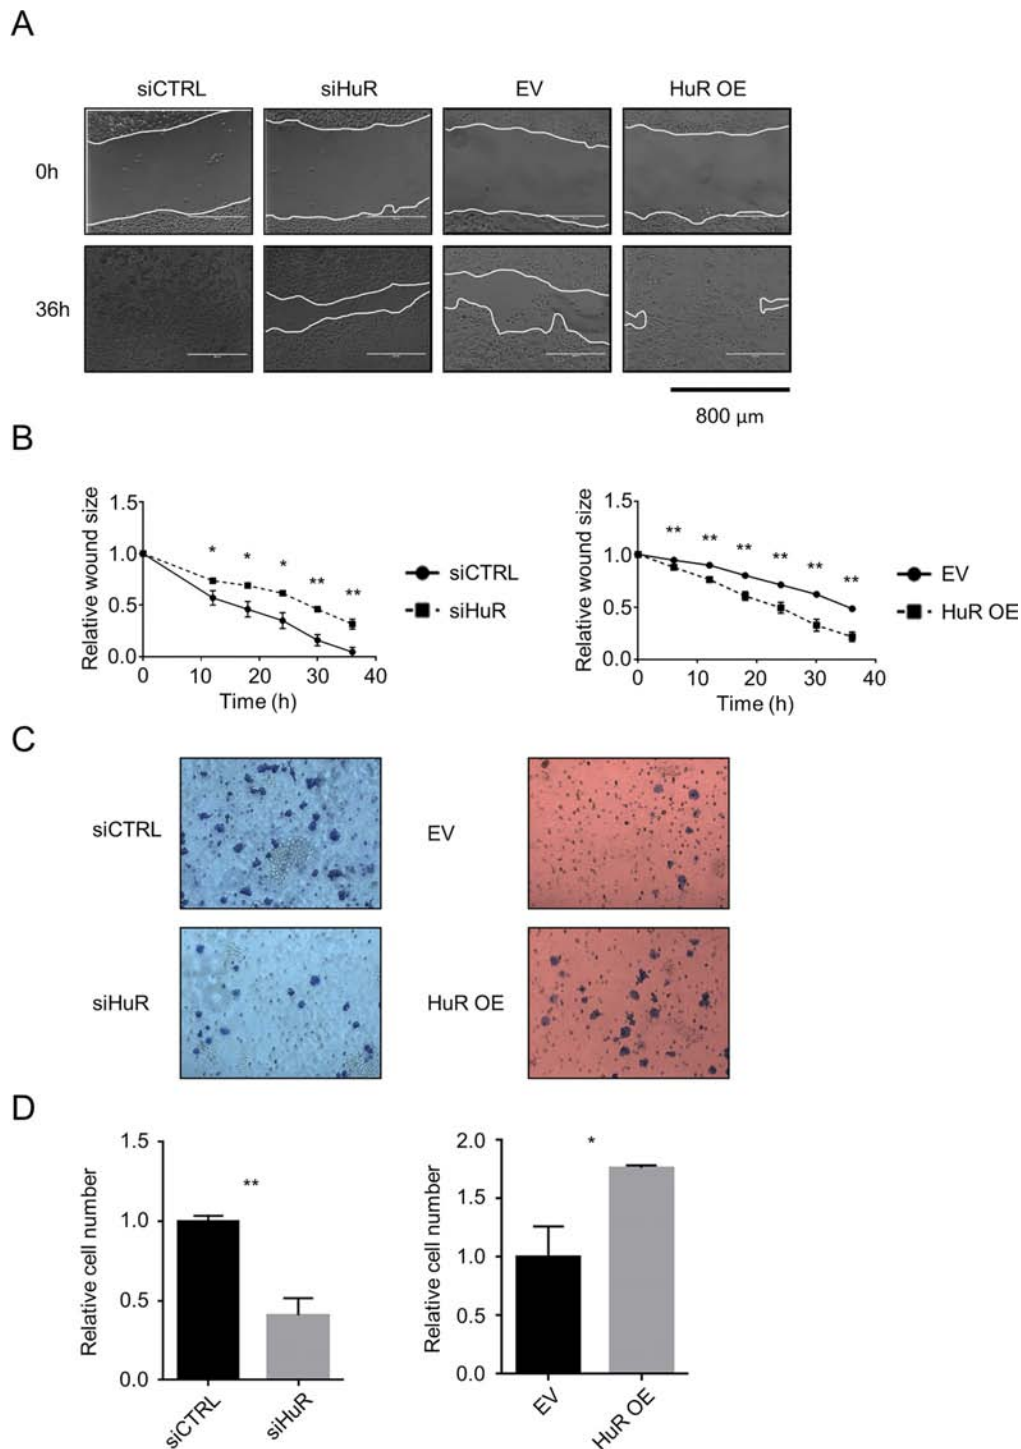

**Supplementary Figure S3: Effects of transient HuR silencing and overexpression on PL5 migration and invasion.**

**A.** Representative images of *in vitro* scratch assays performed with PL5 cells transiently transfected with control siRNA (siCTRL), HuR siRNA (siHuR), empty vector (EV), or HuR overexpression plasmid (HuR OE) for 3 days. Images were taken at 0 h and 36 h post-scratch. Leading edges were outlined in white for ease of visualization. **B.** Quantification of the rate of scratch closure, as measured by change in wound size relative to the 0 h time point. Each data point represents the mean of 3 independent experiments  $\pm$  SEM. **C.** Representative images of Matrigel invasion assays performed with PL5 cells transiently transfected with siCTRL, siHuR, EV, or HuR OE for 3 days. Cells that invaded through the Matrigel and onto the basal surface of transwell inserts were stained with Differential Quik and photographed at 20X magnification. **D.** Quantification of Matrigel invasion assays. Values were normalized to the number of cells in the control groups. Each bar represents the mean of 3 independent experiments  $\pm$  SEM. \* =  $p < 0.05$ ; \*\* =  $p < 0.01$ .

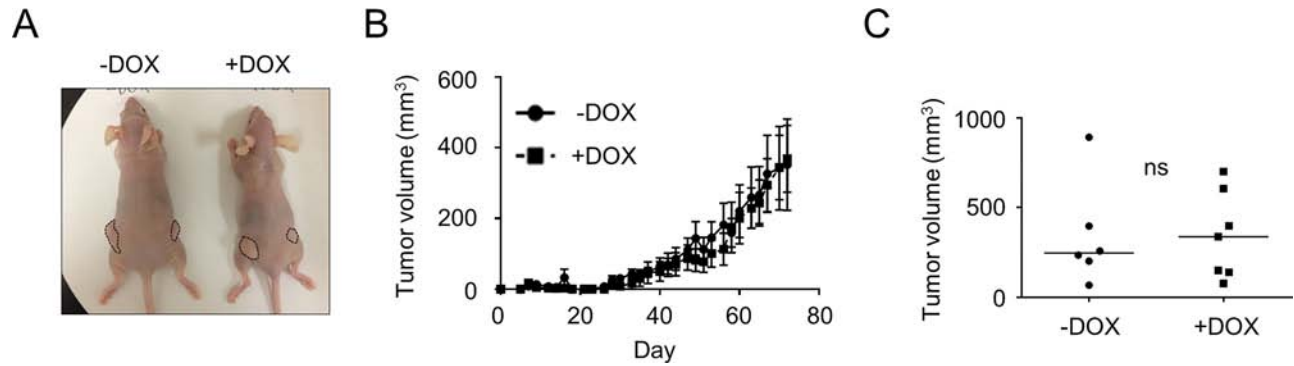

**Supplementary Figure S4: Tumor growth of Mia CTRL xenografts.** **A.** Representative images of subcutaneous Mia CTRL tumors on the flanks of nude female mice, at the termination of the experiment (day 72). **B.** Tumor growth curves of Mia CTRL xenografts. Mice were fed normal diet or 200 mg/kg DOX diet starting on day 0 (date of xenograft injection). Each data point represents the mean  $\pm$  SEM ( $n = 6$  for -DOX group, and  $n = 7$  for +DOX group). **C.** Plot of all tumor volumes on the final day of the Mia CTRL xenograft experiment (day 72). Horizontal bars represent the median tumor volumes. *ns* = non-significant.

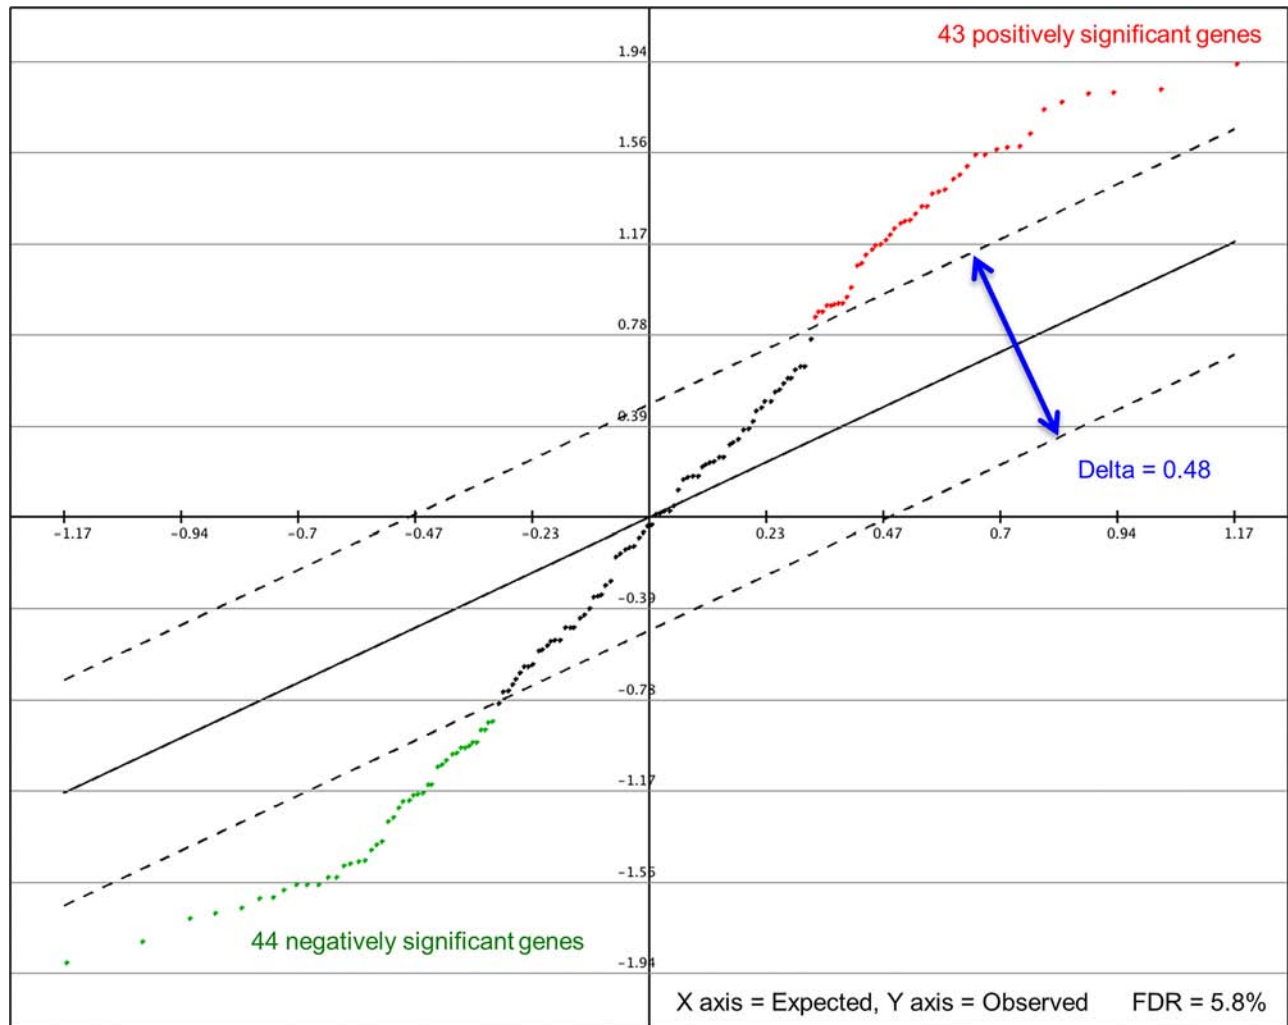

**Supplementary Figure S5: Significance analysis of microarrays (SAM).** SAM of mRNA transcripts differentially regulated in MIA PaCa-2 cells transfected for 72 hours with HuR siRNA, compared to cells transfected with control siRNA. FDR = false discovery rate.

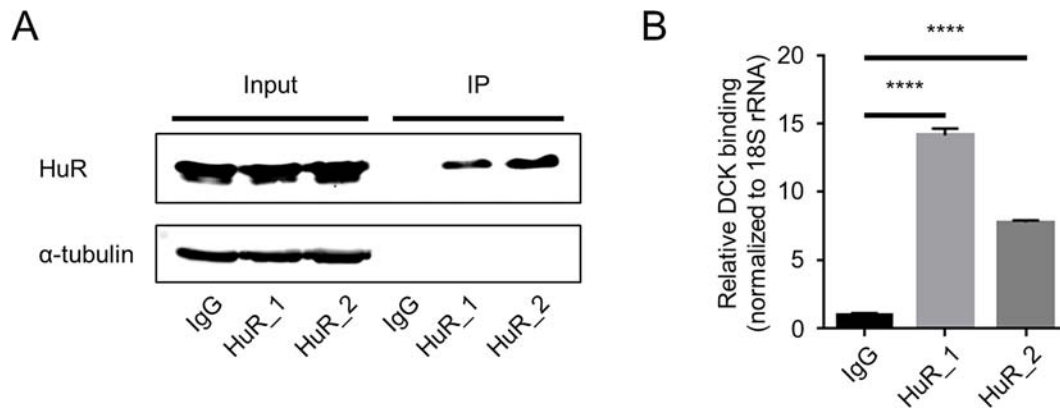

**Supplementary Figure S6: mRNP-IP validation.** **A.** Western blot validation of mRNP-IP experiment. **B.** qPCR validation of mRNP-IP experiment. The relative expression of *DCK* mRNA, a previously identified HuR binding target, in the mRNP-IP RNA samples is shown. 18S rRNA was used as normalization control. IP = immunoprecipitate. \*\*\*\* =  $p < 0.0001$ .

**Supplementary Table S1. Complete gene list of NanoString Technologies nCounter<sup>®</sup> GX Human Cancer Reference Kit.**

**Supplementary Table S2. HuR-bound transcripts identified by NanoString nCounter® analyses.**

| Gene     | Fold enrichment |
|----------|-----------------|
| SFPQ     | 1,289.24        |
| BIRC5    | 1,273.03        |
| TP53     | 1,068.58        |
| CTNNB1   | 788.09          |
| CD44     | 758.39          |
| PRKAR1A  | 606.66          |
| MYC      | 285.82          |
| PCTK1    | 238.12          |
| ITGB1    | 194.52          |
| DEK      | 176.90          |
| CASP2    | 173.47          |
| TOP1     | 169.16          |
| TFDP1    | 164.53          |
| ETV6     | 147.55          |
| MTA1     | 137.25          |
| TUBB     | 134.86          |
| YES1     | 128.01          |
| PTEN     | 122.45          |
| PGK1     | 120.63          |
| GAPDH    | 106.52          |
| HIF1A    | 103.17          |
| PTPN11   | 87.13           |
| CSK      | 80.97           |
| KRAS     | 77.88           |
| PDGFA    | 73.38           |
| HPRT1    | 72.85           |
| NQO1     | 70.36           |
| YY1      | 68.76           |
| HSP90AB1 | 67.34           |
| CCND1    | 66.65           |
| STAT3    | 60.78           |
| RB1      | 59.83           |
| S100A4   | 44.72           |
| NRAS     | 34.04           |
| NF1      | 31.62           |

Full list of transcripts that were enriched in MIA PaCa-2 HuR mRNP-IP samples, compared to control IgG mRNP-IP samples. Fold enrichment = average of the transcript expression in HuR mRNP-IP samples vs. average of the transcript expression in IgG mRNP-IP samples.



**Supplementary Table S3. Biological processes enriched in transcripts regulated by HuR.** Lists of biological process gene ontology (GO) terms significantly enriched in the HuR-regulated transcripts, as analyzed by DAVID. Positive = GO terms significantly enriched in the list of transcripts upregulated upon HuR silencing (see Table 1, *left*). Negative = GO terms significantly enriched in the list of transcripts downregulated upon HuR silencing (see Table 1, *right*). Binders = GO terms significantly enriched in the list of transcripts that are direct HuR targets (see Table S2). Count = number of genes associated with the GO term. Fold enrichment = fold enrichment of the GO term in the associated genes, compared to the background. FDR = false discovery rate.
